# Supplementary material
Source: publisher figshare collection journal article supplement (https://frontiersin.figshare.com/ndownloader/files/24603119)
Supplement: Supplementary file [file 24603119]

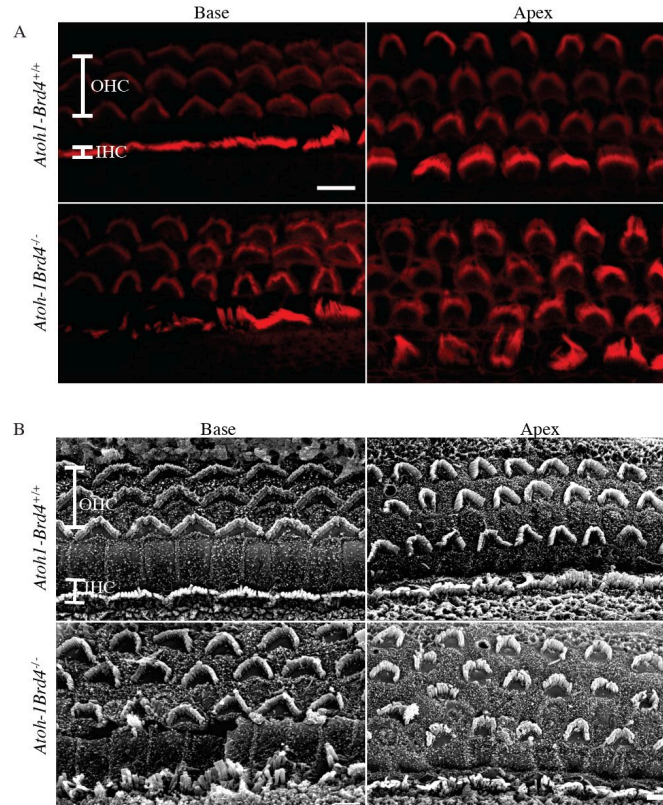

**Supplementary Figure 2.** Figure 2. Stereocilia degeneration **(A)** Z-stack of mouse cochleae (P8, n=3) counterstained for actin filaments (red) (scale: 10 $\mu$ m) shows degeneration of stereocilia in the basal and apical regions of the cochleae in *Atoh1-Brd4*<sup>-/-</sup> compared to the control. **(B)** SEM images of P8 (n=2) mouse cochleae processed using the O-T-O-T-O showed show the difference in the structural integrity of the stereocilia between *Brd4*<sup>+/+</sup> and *Atoh1-Brd4*<sup>-/-</sup> (Scale: 10 $\mu$ m upper panel) in the basal and apical regions of the cochleae.
